# Supplementary material
Source: PubMed Central journal article supplement (PMC4573723)
Supplement: JB.00342-15_zjb999093782so1.pdf [file JB.00342-15_zjb999093782so1.pdf]

Supplemental Fig. S-1 Additional Disk diffusion assay controls

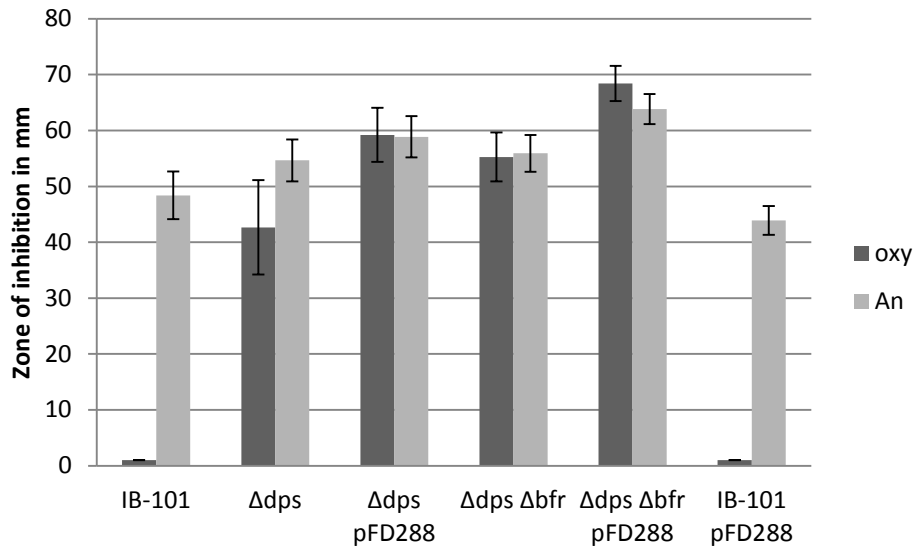

**Supplemental Fig. S-1:** Disk diffusion assays were performed as described in the Materials & Methods. In brief, plates were inoculated and then challenged with tBOOH filter disks. Assays were kept either under anaerobic conditions (light grey bars) or given three hours of aerobic incubation prior to anaerobic overnight incubation. Zones of inhibition were measured in mm. This figure is a control that demonstrates the empty vector, pFD288, does not complement the  $\Delta$ dps and  $\Delta$ dps  $\Delta$ bfr mutants.

Supplemental Figure S-2: Growth curve of  $\Delta dps \Delta bfr$

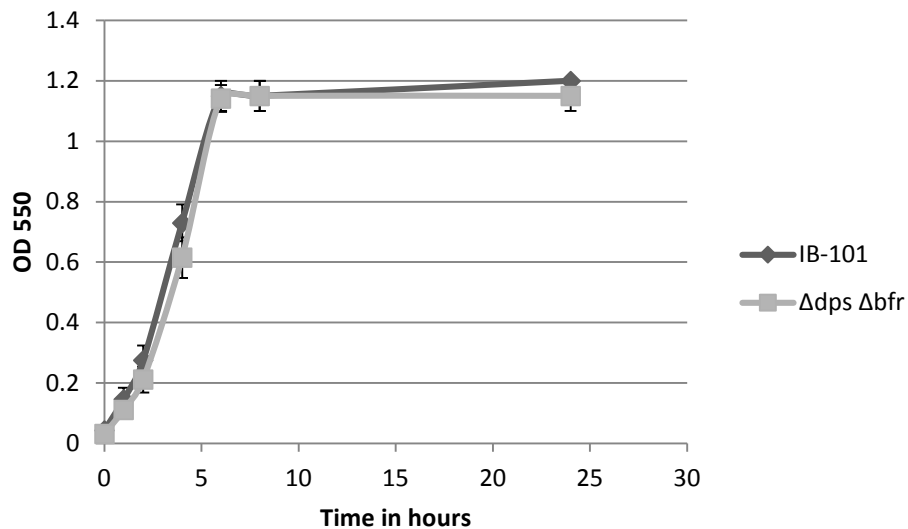

**Supplemental Figure S-2:** The double  $\Delta dps \Delta bfr$  mutant does not have a general growth defect. Cultures were subcultured from overnight stationary phase cultures and growth was measured for IB-101 and  $\Delta dps \Delta bfr$  in BHIS under anaerobic conditions. Triplicate cultures for each strain were followed over two independent experiments. Averages of the six replicates are reported with standard deviation shown. Results indicate that the double mutant does not have a growth defect when compared to WT under normal anaerobic growth conditions.

**Supplemental table S-1 Primers used in this study**

| <b>Primer</b>           | <b>5'-3' Sequence</b>           | <b>Purpose</b>                                                                          |
|-------------------------|---------------------------------|-----------------------------------------------------------------------------------------|
| BfrsL-F                 | CAGTGGATCCCCTAAACCAAAGAATTATGGC | Amplification of full length <i>bfr</i> gene used in complementation forward Primer     |
| BfrsL-R                 | CAGTGAGCTCTGGGGTATTCCTCTTTCTA   | Amplification of full length <i>bfr</i> gene used in complementation reverse primer     |
| Bfr-1-For               | CCCCATGTTACATAACC               | Used to verify deletion of <i>bfr</i> gene in $\Delta dps\Delta bfr$ forward primer     |
| Bfr-2-Rev               | CGGTCACTGTAGCAAGCG              | Used to verify deletion of <i>bfr</i> gene in $\Delta dps\Delta bfr$ reverse primer     |
| AHPC-1-<br><i>EcoRI</i> | GCCATCAGAATTCCTCCCATC           | Amplification of N-terminal region of <i>ahpc</i> for deletion construct forward primer |
| AHPC-2-<br><i>EcoRI</i> | CCTGTACTTTGAATTCAGGC            | Amplification of N-terminal region of <i>ahpc</i> for deletion construct reverse primer |
| AHPC-3-<br><i>BglII</i> | GGTCGGTAAGATCTAAACAGC           | Amplification of C-terminal region of <i>ahpc</i> for deletion construct forward primer |
| AHPC-4-<br><i>SphI</i>  | CCTTTCCAGCATGCTCTATC            | Amplification of c-terminal region of <i>ahpc</i> for deletion construct reverse primer |

**Supplemental Table S-2: Gene accession numbers for Ferritin homologs in the *Bacteroides***

| <b>Strains</b>                           | <b><i>dps</i> genes</b> | <b>GenBank Accession #</b> | <b><i>dpsL/bfr</i> genes</b> | <b>GeneBank Accession #</b> | <b><i>ftnA</i> genes</b> | <b>GeneBank Accession #</b>      |
|------------------------------------------|-------------------------|----------------------------|------------------------------|-----------------------------|--------------------------|----------------------------------|
| <i>B. fragilis</i> 638R                  | 1                       | AAG02618                   | 1                            | CBW23774                    | 1                        | AAK29742                         |
| <i>B. caccae</i><br>ATCC 43185           | 1                       | EDM20674                   | 1                            | EDM19603                    | 1                        | EDM20344                         |
| <i>B. ovatus</i><br>ATCC 8433            | 1                       | EDO09702                   | 1                            | EDO11031                    | 1                        | EDO14102                         |
| <i>B. vulgatus</i><br>ATCC 8482          | None                    | -                          | 1                            | ABR41194                    | 3                        | ABR41141<br>ABR40404<br>ABR41143 |
| <i>B. uniformis</i><br>ATCC 8492         | 1                       | EDO55385                   | None                         | -                           | 3                        | EDO51842<br>EDO55572<br>EDO55570 |
| <i>B. thetaiotaomicron</i><br>ATCC 29148 | 1                       | AAO79820                   | 1                            | AAO78928                    | 3                        | AAO76480<br>AAO76214<br>AAO76216 |
| <i>P. merdae</i><br>ATCC 43184           | 1                       | EDN86811                   | None                         | -                           | 3                        | EDN87770<br>EDN84345<br>EDN84347 |
| <i>P. distasonis</i><br>ATCC 8503        | 2                       | ABR42394<br>ABR42396       | 1                            | ABR43121                    | 2                        | ABR41895<br>ABR42042             |

**Table S-3: Strains used in supplemental section**

| Strain or plasmid          | Phenotype and/or genotype <sup>a</sup>                                                 | Reference or source |
|----------------------------|----------------------------------------------------------------------------------------|---------------------|
| <i>Bacteroides</i> strains |                                                                                        |                     |
| IB-101                     | <i>B. fragilis</i> 638R Clinical Isolate, Rif <sup>r</sup>                             | (1)                 |
| IB 336                     | IB-101 $\Delta$ <i>dps::tetQ</i> , Rif <sup>r</sup> Tet <sup>r</sup>                   | (2)                 |
| IB-542                     | IB-336 $\Delta$ <i>bfr::cfx</i> , Rif <sup>r</sup> Tet <sup>r</sup> Cfx <sup>r</sup>   | This Study          |
| IB-574                     | IB-336 pFD288, Rif <sup>r</sup> , Tet <sup>r</sup> , Cfx <sup>r</sup> Erm <sup>r</sup> | This Study          |
| IB-575                     | IB-542 pFD288, Rif <sup>r</sup> , Tet <sup>r</sup> , Erm <sup>r</sup>                  | This Study          |
| IB-579                     | IB-101 pFD288, Rif <sup>r</sup> , Tet <sup>r</sup> , Erm <sup>r</sup>                  |                     |
| Plasmids                   |                                                                                        |                     |
| pFD288                     | (Sp <sup>r</sup> ),Erm <sup>r</sup> , oriT, pUC19::pBI143 8.8-kb shuttle vector        |                     |

<sup>a</sup>Erm<sup>r</sup>, erythromycin resistance; Cfx<sup>r</sup>, cefoxitin resistance; Rif<sup>r</sup> rifampicin resistance; Tet<sup>r</sup>, tetracycline resistance; Sp<sup>r</sup>, spectinomycin resistance. For *Bacteroides-E. coli* shuttle vectors, parentheses indicate antibiotic resistance expression in *E. coli*.

1. **Privitera, G., A. Dublanchet, and M. Sebald.** 1979. Transfer of multiple antibiotic resistance between subspecies of *Bacteroides fragilis*. *J. Infect. Dis.* **139**:97-101.
2. **Rocha, E. R., and C. J. Smith.** 2004. Transcriptional regulation of the *Bacteroides fragilis* ferritin gene (*ftnA*) by redox stress. *Microbiology.* **150**:2125-2134.
